# Supplementary material
Source: Springer Nature journal article supplement (https://www.springermedizin.de/resource/supplementary/12889_2006_678_MOESM2_ESM.pdf/9502284)

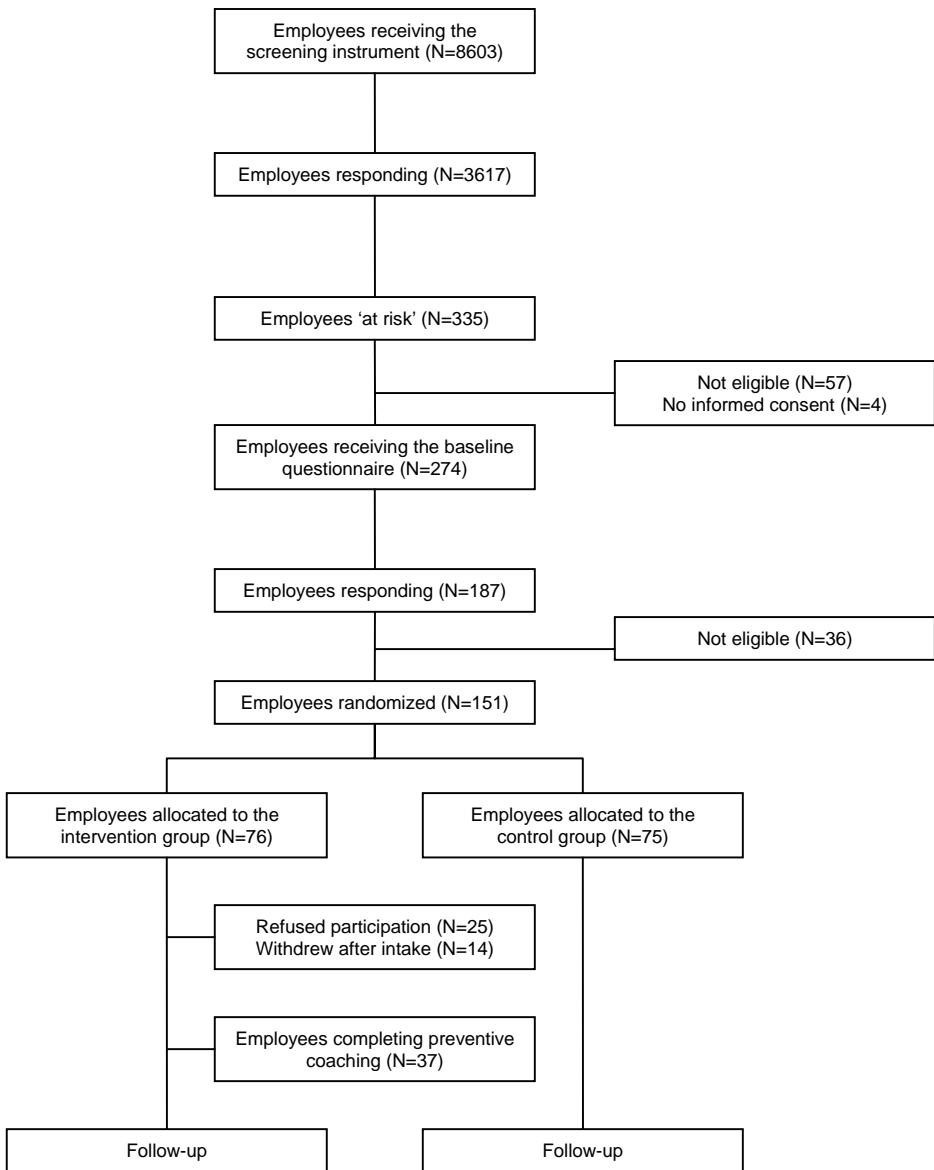

Supplement: MOESM2 [file 9502284]
